# Supplementary material
Source: PubMed Central journal article supplement (PMC6292506)
Supplement: NIHMS79992-supplement-Supplementary_Tables_2-4.pdf [file NIHMS79992-supplement-Supplementary_Tables_2-4.pdf]

**Supplementary Table 2 - List of plasmids used in this study**

| <b>Plasmid</b> | <b>Protein Expressed</b>                                             |
|----------------|----------------------------------------------------------------------|
| p976           | pGex-6P-2-GST                                                        |
| p677           | pET21a-Net1(1-600)-His <sub>6</sub>                                  |
| p700           | pET21b-GST-Cdc14                                                     |
| p782           | pET15b-His <sub>6</sub> -Cdc14 (1-374)                               |
| p1289          | pET15b-His <sub>6</sub> -GFP-Cdc14                                   |
| p1290          | pET15b-His <sub>6</sub> -1HA-Cdc14                                   |
| p1293          | pET15b-His <sub>6</sub> -GFP-Cdc14-Q106L                             |
| p1294          | pET15b-His <sub>6</sub> -GFP-Cdc14-W108R                             |
| p1295          | pET15b-His <sub>6</sub> -Cdc14 (1-374)                               |
| p1297          | pET15b-His <sub>6</sub> -GFP-Cdc14-GETS (V120G, D121E, P122T, P123S) |
| p1328          | pET21b-GST-Cdc14-Tab6 (P116L)                                        |
| p1330          | pET21b-GST-Cdc14-W108R                                               |

**Supplementary Table 3 - List of peptides used in this study**

| Peptide                        | N-terminus                  | Sequence                                         | C-terminus | Figures                |
|--------------------------------|-----------------------------|--------------------------------------------------|------------|------------------------|
| Chk1 - WT                      | acetyl                      | FTDVPALNYPATPPPH                                 | amide      | Fig. 1, 3, Sup. Fig. 6 |
| Chk1 - P86G                    | acetyl                      | FTDVGALNYPATPPPH                                 | amide      | Fig. 1                 |
| Sic1 - WT                      | acetyl                      | PSTTKSFKNAPLLAPP                                 | amide      | Fig. 1, 3              |
| Sic1 - P56G                    | acetyl                      | PSTTKSFKNAGLLAPP                                 | amide      | Fig. 1                 |
| Kar9 - WT                      | acetyl                      | KGKLLSSVPPLPYDE                                  | amide      | Fig. 1                 |
| Kar9 - P508G                   | acetyl                      | KGKLLSSVGPLPYDE                                  | amide      | Fig. 1                 |
| Chk1-L88G                      | acetyl                      | FTDVPAGNYPATPPPH                                 | amide      | Sup. Fig. 1            |
| Chk1-F82G, V85G                | acetyl                      | GTDGPALNYPATPPPH                                 | amide      | Sup. Fig. 1            |
| Chk1-Y90G                      | acetyl                      | FTDVPALNGPATPPPH                                 | amide      | Sup. Fig. 1            |
| Chk1-Δ91-97                    | acetyl                      | FTDVPALNY                                        | amide      | Sup. Fig. 1            |
| biotin - Chk1 - WT             | biotin - aminohexanoic acid | FTDVPALNYPATPPPH                                 | amide      | Fig. 4, Sup. Fig. 2, 9 |
| biotin - Chk1 - scr            | biotin - aminohexanoic acid | YVPAPAPPTTPLNFDHP                                | amide      | Fig. 4, Sup. Fig. 2, 9 |
| PxL - Sic1 disordered + SPxAAA | acetyl                      | FTDVPALNYPATPPPH                                 | amide      | Fig. 6                 |
| AxG - Sic1 disordered + SPxAAA | acetyl                      | FTDVAAGNYPATPPPH-TSPLG(p)SPLAAFNGLTSPQRSFPFKSSVK | amide      | Fig. 6                 |
| PxL - Sic1 disordered + TPxAAA | acetyl                      | FTDVPALNYPATPPPH-TSPLG(p)TPLAAFNGLTSPQRSFPFKSSVK | amide      | Sup. Fig. 9            |
| AxG - Sic1 disordered + TPxAAA | acetyl                      | FTDVAAGNYPATPPPH-TSPLG(p)TPLAAFNGLTSPQRSFPFKSSVK | amide      | Sup. Fig. 9            |

**Supplementary Table 4 - List of yeast strains used in this study**

| <b>Strain name</b> | <b>Genotype</b>                                                                                       | <b>Background</b> |
|--------------------|-------------------------------------------------------------------------------------------------------|-------------------|
| 1262               | <i>MATa cdc14-1</i>                                                                                   | W303              |
| 4636               | <i>MATa cdc14-1, trp1::TRP1-CDC14pr-CDC14-GFP</i>                                                     | W303              |
| 5488               | <i>MATa CBK1-HA6::HIS3</i>                                                                            | W303              |
| 5489               | <i>MATa CBK1-HA6::HIS3 CDC14-MYC18::TRP1</i>                                                          | W303              |
| 5493               | <i>MATa CBK1-AxG (P86A, L88G)-HA6::HIS3</i>                                                           | W303              |
| 5494               | <i>MATa CBK1-AxG (P86A, L88G)-HA6::HIS3 CDC14-MYC18::TRP1</i>                                         | W303              |
| 5498               | <i>MATa CBK1-HA6::HIS3 hof1Δ::TRP1</i>                                                                | W303              |
| 5506               | <i>MATa CBK1-AxG (P86A, L88G)-HA6::HIS3 hof1Δ::TRP1</i>                                               | W303              |
| 5507               | <i>MATa CBK1-HA6::HIS3 cyk3Δ::TRP1</i>                                                                | W303              |
| 5508               | <i>MATa CBK1-AxG (P86A, L88G)-HA6::HIS3 cyk3Δ::TRP1</i>                                               | W303              |
| 5511               | <i>MATa prGAL1-CDC20::LEU2 ORC6-PxL (FTDVPALNYPAAPPPH)-PK3::TRP1 FIN1-HA3::URA3</i>                   | W303              |
| 5515               | <i>MATa prGAL1-CDC20::LEU2 ORC6-PK3::TRP1 FIN1-HA3::URA3</i>                                          | W303              |
| 5519               | <i>MATa cdc14-1 trp1::TRP1-pCDC14-CDC14-GFP CBK1-HA6::HIS3</i>                                        | W303              |
| 5520               | <i>MATa cdc14-1 trp1::TRP1-pCDC14-CDC14-W108R-GFP CBK1-HA6::HIS3</i>                                  | W303              |
| 5521               | <i>MATa prGAL1-CDC20::LEU2 ORC6-PxL (FTDVPALNYPAAPPPH)-PK3::TRP1 FIN1-HA3::URA3 CDC14-MYC18::HIS3</i> | W303              |
| 5522               | <i>MATa prGAL1-CDC20::LEU2 ORC6-PK3::TRP1 FIN1-HA3::URA3 CDC14-MYC18::HIS3</i>                        | W303              |
| 5523               | <i>MATa cdc14-1 trp1::TRP1-pCDC14-CDC14-GETS (V120G, D121E, P122T, P123S)-GFP</i>                     | W303              |
